# Supplementary material
Source: PubMed Central journal article supplement (PMC3465403)
Supplement: 1205875109_SD01.pdf [file 1205875109_SD01.pdf]

#NEXUS

Begin data;

Dimensions ntax=37 nchar=163;

Format Datatype= standard symbols= "01234567" gap=-;

Matrix

|                 |   |   |   |   |   |   |   |   |   |   |   |   |   |   |   |
|-----------------|---|---|---|---|---|---|---|---|---|---|---|---|---|---|---|
| Endeis          | 1 | 1 | 0 | 0 | 0 | - | 0 | 0 | - | 5 | 1 | 0 | 0 | ? | - |
|                 | 0 | - | - | 0 | - | 0 | 0 | ? | - | - | - | - | 1 | 1 | 0 |
|                 | 0 | - | ? | - | 0 | 0 | ? | - | ? | 0 | - | 1 | 1 | 0 | ? |
|                 | 0 | - | - | 1 | 2 | 2 | 0 | 0 | 0 | 0 | - | 0 | - | - | 1 |
|                 | 0 | 0 | 0 | ? | 0 | 0 | 0 | - | ? | 0 | 0 | - | - | ? | 0 |
|                 | ? | ? | 0 | - | 0 | 0 | 0 | 1 | 0 | 0 | 0 | 0 | - | - | 0 |
|                 | 0 | 0 | 0 | 0 | 0 | - | ? | - | 0 | 0 | - | - | - | 0 | 0 |
|                 | - | - | - | 3 | 1 | 0 | 0 | - | - | ? | ? | 0 | - | 0 | - |
|                 | - | 0 | 0 | ? | 1 | 1 | - | 1 | 0 | 0 | ? | 0 | 0 | 0 | 0 |
|                 | 0 | - | 0 | 0 | ? | 0 | - | - | - | - | - | - | - | 0 | 0 |
|                 | 0 | - | 0 | 0 | - | - | - | ? | ? | 0 | ? | ? | - | - | 0 |
| Colossendeis    | 1 | 1 | 0 | 0 | 0 | - | 0 | 0 | - | 5 | 1 | 0 | 0 | ? | - |
|                 | - | 0 | - | - | 0 | - | 0 | 0 | ? | - | - | - | - | 1 | 1 |
|                 | 0 | 0 | - | ? | - | 0 | 0 | ? | - | ? | 0 | - | 1 | 1 | 0 |
|                 | ? | 0 | - | - | - | - | - | 0 | 0 | - | - | 2 | 0 | - | - |
|                 | 1 | 0 | 0 | 0 | ? | 0 | 0 | 0 | - | ? | 0 | 0 | - | - | ? |
|                 | 0 | ? | ? | 0 | - | 0 | 0 | 0 | 1 | 0 | 0 | 0 | 0 | - | - |
|                 | 0 | 0 | 0 | 0 | 0 | 0 | - | ? | - | 0 | 0 | - | - | - | 0 |
|                 | 0 | - | - | - | 3 | 1 | 0 | 0 | - | - | ? | ? | 0 | - | 0 |
|                 | - | - | 0 | 0 | ? | 1 | 1 | - | 1 | 0 | 0 | ? | 0 | 0 | 0 |
|                 | 0 | 0 | - | 0 | 0 | ? | 0 | - | - | - | - | - | - | - | 0 |
|                 | 0 | 0 | - | 0 | 0 | - | - | - | ? | ? | ? | ? | - | - | 0 |
| Ammotheidae     | 1 | 1 | 0 | 0 | 0 | - | 0 | 0 | - | 5 | ? | 0 | 0 | ? | - |
|                 | - | 0 | - | - | 0 | - | 0 | 0 | ? | - | - | - | - | 1 | 1 |
|                 | 0 | 0 | - | ? | - | 0 | 0 | ? | - | ? | 0 | - | 1 | 1 | 0 |
|                 | ? | 0 | - | - | 1 | 2 | 2 | 0 | 0 | 0 | 0 | 2 | 0 | - | - |
|                 | 1 | 0 | 0 | 0 | ? | 0 | 0 | 0 | - | ? | 0 | 0 | - | - | ? |
|                 | 0 | ? | ? | 0 | - | 0 | 0 | 0 | 1 | 0 | 0 | 0 | 0 | - | - |
|                 | 0 | 0 | 0 | 0 | 0 | 0 | - | ? | - | 0 | 0 | - | - | - | 0 |
|                 | 0 | - | - | - | 3 | 1 | 0 | 0 | - | - | ? | ? | 0 | - | 0 |
|                 | - | - | 0 | 0 | ? | 1 | 1 | - | 1 | 0 | 0 | 0 | 0 | 0 | 0 |
|                 | 0 | 0 | - | 0 | 0 | ? | 0 | - | - | - | - | - | - | - | 0 |
|                 | 0 | 0 | - | 0 | 0 | - | - | - | 0 | 0 | 0 | ? | ? | - | 0 |
| Haliestes       | 1 | 1 | 0 | 0 | 0 | - | 0 | 0 | - | 5 | ? | 0 | 0 | ? | - |
|                 | - | 0 | - | - | 0 | - | 0 | 0 | ? | - | - | - | - | 1 | 0 |
|                 | 0 | 0 | - | ? | - | 0 | 0 | ? | - | 0 | 0 | - | 1 | 1 | 0 |
|                 | ? | 0 | - | - | 1 | 1 | 2 | 0 | 0 | ? | ? | 2 | 0 | - | - |
|                 | 1 | 0 | 0 | ? | ? | ? | ? | ? | - | ? | ? | 0 | - | - | ? |
|                 | ? | ? | 0 | 0 | - | 0 | 0 | 0 | 1 | 0 | 0 | 0 | 0 | - | - |
|                 | 0 | 0 | 0 | 0 | 0 | 0 | - | ? | - | 0 | 0 | - | - | - | 0 |
|                 | 0 | - | - | - | ? | 1 | 0 | 0 | - | - | ? | ? | 0 | - | 0 |
|                 | - | - | 0 | 0 | ? | 1 | 1 | ? | ? | ? | ? | ? | ? | ? | 0 |
|                 | ? | ? | ? | ? | ? | ? | 0 | - | - | - | - | - | - | - | 0 |
|                 | ? | 0 | - | 0 | ? | - | - | - | ? | ? | ? | ? | ? | ? | 0 |
| Limulus         | 1 | 1 | 0 | 0 | 1 | - | 0 | 0 | 1 | 5 | 0 | 0 | 1 | 1 | 0 |
|                 | 0 | - | - | 0 | 0 | 0 | 1 | 0 | 0 | 0 | 0 | 1 | 0 | - | 0 |
|                 | 0 | 0 | 0 | 0 | 0 | 0 | 0 | 1 | ? | 0 | - | 1 | 1 | 1 | 1 |
|                 | 0 | 0 | - | 1 | 2 | 2 | 0 | 0 | 0 | 0 | 0 | 0 | - | - | 0 |
|                 | 0 | 0 | 0 | 0 | 0 | 0 | 0 | - | 2 | 0 | 0 | - | - | ? | 0 |
|                 | 1 | 1 | 0 | - | 0 | 0 | 0 | 1 | 0 | 1 | 0 | 0 | 1 | 1 | 1 |
|                 | 0 | 1 | 0 | 0 | 0 | - | 1 | - | 0 | 1 | 0 | 0 | 0 | 0 | 1 |
|                 | 0 | 0 | 1 | 1 | 0 | 0 | 0 | 0 | 0 | 1 | 2 | 0 | - | 1 | 0 |
|                 | 0 | 0 | 0 | 0 | 0 | 0 | 0 | 1 | 0 | 0 | 0 | 0 | 0 | 0 | 0 |
|                 | 1 | 0 | 1 | 0 | 1 | 0 | 1 | 0 | 0 | 1 | 1 | 1 | - | 0 | 0 |
|                 | 0 | - | 0 | 0 | 0 | 0 | 0 | 0 | 0 | 0 | 1 | 0 | - | - | 0 |
| Carcinoscorpius | 1 | 1 | 0 | 0 | 1 | 0 | 0 | 0 | 1 | 5 | 0 | 0 | 1 | 1 | 1 |
|                 | 0 | 0 | - | - | 0 | 0 | 0 | 1 | 0 | 0 | 0 | 1 | 0 | - | - |
|                 | 0 | 0 | 0 | 0 | 0 | 0 | 0 | 0 | 1 | ? | 0 | - | 1 | 1 | 1 |
|                 | 1 | 0 | 0 | - | 1 | 2 | 2 | 0 | 0 | ? | 0 | 0 | - | - | ? |
|                 | 0 | 0 | 0 | 0 | 0 | 0 | 0 | 0 | - | 2 | 0 | 0 | - | - | ? |
|                 | 0 | 1 | 1 | 0 | - | 0 | 0 | 0 | 1 | 0 | 1 | 0 | 0 | 1 | 1 |
|                 | 1 | 0 | 1 | 0 | 0 | 0 | - | 1 | - | 0 | 1 | 0 | ? | 0 | 0 |
|                 | 1 | ? | ? | 1 | 1 | 0 | 0 | 0 | 0 | 1 | 2 | 0 | - | 1 | 1 |
|                 | 0 | 0 | 0 | 0 | 0 | 0 | 0 | 0 | 1 | 0 | 0 | 0 | 0 | 0 | 0 |
|                 | 0 | 1 | 0 | 1 | 0 | 1 | 0 | 1 | 0 | 0 | 1 | 1 | 1 | - | 0 |
|                 | 0 | 0 | - | 0 | 0 | 0 | 0 | 0 | 0 | 0 | 0 | 1 | 0 | - | 0 |

|                 |   |   |   |   |   |   |   |   |   |   |   |   |   |   |
|-----------------|---|---|---|---|---|---|---|---|---|---|---|---|---|---|
| Offacolus       | 1 | 1 | 0 | 0 | 1 | 0 | 0 | 0 | ? | 5 | 0 | 0 | ? | ? |
| 0               | 0 | - | - | 0 | 0 | 0 | 1 | ? | 0 | 0 | 0 | 0 | 0 | - |
| 0               | 0 | ? | ? | 0 | 0 | 0 | ? | 1 | 0 | 0 | - | 1 | 1 | 1 |
| 1               | 0 | 0 | - | 1 | ? | 2 | 1 | 0 | 0 | ? | 0 | 0 | - | 0 |
| 0               | 0 | 0 | ? | ? | ? | ? | ? | ? | ? | ? | 0 | - | - | ? |
| ?               | ? | 1 | 0 | - | 0 | 0 | 0 | 0 | 0 | 0 | 0 | 0 | 1 | 0 |
| 1               | 0 | 1 | 0 | 0 | 0 | 0 | 1 | - | 0 | 0 | - | - | - | 0 |
| 0               | ? | ? | ? | 0 | 0 | ? | 0 | 0 | 0 | 1 | ? | 0 | - | ? |
| 0               | 0 | 0 | 0 | 0 | 0 | ? | ? | ? | ? | ? | ? | ? | ? | 0 |
| ?               | ? | ? | ? | ? | 1 | 0 | 1 | ? | 0 | 1 | 1 | 1 | - | 0 |
| ?               | 0 | - | 0 | ? | 0 | 0 | 0 | ? | ? | ? | ? | ? | ? | ? |
| Dibasterium     | 1 | 1 | 0 | 0 | 1 | 0 | 0 | 0 | ? | 5 | 0 | 0 | ? | 0 |
| 0               | 0 | - | - | 0 | 0 | 0 | 1 | 2 | 0 | 0 | 0 | 0 | 0 | - |
| 0               | 0 | 0 | 2 | 0 | 0 | 0 | 0 | 1 | 0 | 0 | - | 1 | 1 | 1 |
| 1               | 0 | 0 | - | 1 | ? | 2 | 1 | 0 | 0 | ? | 0 | 0 | - | 0 |
| 0               | 0 | 0 | ? | ? | ? | ? | ? | ? | ? | ? | 1 | 0 | - | ? |
| ?               | ? | 1 | 0 | - | 0 | 0 | 0 | 0 | 0 | 1 | 0 | 0 | 1 | 1 |
| 1               | 0 | 1 | 0 | 0 | 0 | 0 | 1 | - | 0 | 0 | - | - | - | 0 |
| 0               | ? | ? | ? | 0 | 0 | ? | 0 | 0 | 0 | 1 | ? | 0 | - | ? |
| 0               | 0 | 0 | 0 | 0 | 0 | ? | ? | ? | ? | ? | ? | ? | ? | 0 |
| ?               | ? | ? | ? | ? | 1 | 0 | 1 | ? | 0 | 1 | 1 | 1 | - | 0 |
| ?               | 0 | - | 0 | ? | 0 | 0 | 0 | ? | ? | ? | ? | ? | ? | ? |
| Weinbergina     | 1 | 1 | 0 | 0 | 1 | 0 | 0 | 0 | ? | 5 | 0 | 0 | 1 | 0 |
| 0               | 0 | - | - | 0 | 0 | 0 | 1 | 1 | 0 | 0 | 0 | 0 | 0 | - |
| 0               | 0 | 0 | 2 | 0 | 0 | 0 | 0 | 1 | 0 | 0 | - | 1 | 1 | ? |
| 1               | 0 | 0 | - | 1 | ? | 2 | ? | 0 | 0 | ? | 0 | 0 | - | 0 |
| 0               | 0 | 0 | ? | ? | ? | ? | ? | ? | ? | ? | 1 | 0 | - | ? |
| ?               | 1 | ? | 0 | - | 0 | 0 | 0 | 0 | ? | 1 | 0 | 0 | 1 | 1 |
| ?               | 0 | 1 | 0 | 0 | 0 | 0 | 1 | - | 0 | 0 | - | - | - | 0 |
| 0               | ? | ? | ? | 0 | 0 | ? | 0 | 0 | 0 | 1 | ? | 0 | - | ? |
| 0               | 0 | 0 | 0 | 0 | 0 | ? | ? | ? | ? | ? | ? | ? | ? | 0 |
| ?               | ? | ? | ? | ? | 1 | 0 | 1 | ? | 0 | 1 | 1 | 1 | - | 0 |
| ?               | 0 | - | 0 | ? | 0 | 0 | 0 | ? | ? | ? | ? | ? | ? | ? |
| Alanops         | 1 | 1 | 0 | 0 | 1 | 0 | 0 | 0 | 1 | 5 | 0 | 0 | 1 | 0 |
| 0               | - | - | 0 | 0 | 0 | 0 | 1 | ? | 0 | 0 | 0 | 1 | 0 | 0 |
| 0               | 0 | 0 | 0 | 0 | 0 | 0 | 1 | 0 | 0 | 0 | - | 1 | 1 | 0 |
| 0               | 0 | 0 | - | 1 | ? | 2 | 0 | 0 | ? | 0 | 0 | - | 0 | 0 |
| 0               | 0 | ? | ? | ? | ? | ? | ? | ? | ? | ? | ? | ? | ? | ? |
| 1               | 1 | 0 | - | 0 | 0 | 0 | 0 | 0 | ? | 0 | 0 | 1 | 1 | 1 |
| 0               | ? | 0 | 0 | 0 | 0 | 1 | - | 0 | ? | ? | ? | ? | 0 | 0 |
| ?               | ? | ? | ? | 0 | ? | 0 | 0 | 0 | 1 | ? | 0 | - | ? | 0 |
| 0               | 0 | 0 | 0 | 0 | ? | ? | ? | ? | ? | ? | ? | ? | 0 | ? |
| ?               | ? | ? | ? | ? | 1 | 0 | ? | ? | ? | ? | ? | - | 0 | ? |
| 0               | - | 0 | ? | 0 | 0 | 0 | ? | ? | ? | ? | ? | ? | ? | ? |
| Baltoeurypterus | 1 | 1 | 0 | 0 | 1 | 0 | 0 | 0 | 1 | 5 | 0 | 0 | 1 | 0 |
| 0               | 1 | 0 | 3 | 0 | 0 | 0 | 0 | 3 | 0 | 0 | 0 | 0 | 0 | - |
| 0               | 0 | 0 | 3 | 0 | 0 | 0 | 0 | 0 | 0 | 0 | - | 1 | 1 | 1 |
| 1               | 0 | - | - | 1 | 2 | 2 | 0 | 0 | ? | 0 | 0 | - | - | - |
| 0               | 0 | 0 | 1 | ? | 0 | 0 | 0 | 0 | 0 | ? | 1 | 0 | - | ? |
| ?               | 1 | 0 | 0 | - | 0 | 0 | 0 | 0 | 1 | 0 | 1 | 1 | 0 | 0 |
| 0               | 0 | 1 | 0 | 0 | 0 | 0 | 1 | ? | 0 | 1 | 0 | ? | 0 | 0 |
| 0               | ? | ? | ? | 1 | 0 | ? | 0 | 0 | 1 | ? | 0 | - | - | 1 |
| 0               | 0 | 0 | 0 | 0 | 0 | ? | ? | ? | ? | ? | ? | ? | 0 | 0 |
| ?               | ? | ? | ? | ? | ? | 0 | 1 | ? | ? | ? | ? | 0 | - | 0 |
| 1               | 0 | - | 1 | 0 | 0 | 0 | 0 | ? | ? | ? | ? | ? | ? | ? |
| Pterygotus      | 1 | 1 | 0 | 0 | 1 | 0 | 0 | 0 | 1 | 5 | 0 | 0 | ? | 0 |
| 0               | 1 | 0 | 3 | 0 | 0 | 0 | 0 | 3 | 0 | 0 | 0 | 0 | 0 | - |
| 0               | 0 | 0 | 3 | 0 | 0 | 0 | 1 | 0 | 0 | 0 | - | 1 | 1 | 0 |
| 1               | 0 | 0 | - | 1 | 2 | 2 | 0 | 0 | 0 | ? | 0 | 0 | - | - |
| 0               | 0 | 0 | 1 | ? | 0 | 0 | 0 | 0 | ? | ? | 1 | 0 | - | ? |
| ?               | 1 | 0 | 0 | - | 0 | 0 | 0 | 0 | 1 | 0 | 1 | 1 | 0 | 0 |
| 0               | 0 | 1 | 0 | 0 | 0 | 0 | 1 | ? | 0 | 1 | 0 | ? | 0 | 0 |
| 0               | ? | ? | ? | 1 | 0 | ? | 0 | 0 | 0 | 1 | ? | 0 | - | 1 |
| 0               | 0 | 0 | 0 | 0 | 0 | ? | ? | ? | ? | ? | ? | ? | 0 | 0 |
| ?               | ? | ? | ? | ? | ? | 0 | ? | ? | ? | ? | ? | ? | - | 0 |
| ?               | 0 | - | 1 | ? | 0 | 0 | 0 | ? | ? | ? | ? | ? | ? | ? |
| Parasyllonurus  | 1 | 1 | 0 | 0 | 1 | 0 | 0 | 0 | 1 | 5 | 0 | 0 | ? | 0 |
| 0               | 1 | 0 | 3 | 0 | 0 | 0 | 0 | 3 | 0 | 0 | 0 | 0 | 0 | - |
| 0               | 0 | 0 | 3 | 0 | 0 | 0 | ? | 0 | 0 | 0 | - | 1 | 1 | 0 |
| 1               | 0 | 0 | - | 1 | 2 | 2 | 0 | 0 | 0 | ? | 0 | 0 | - | - |
| 0               | 0 | 0 | 1 | ? | 0 | 0 | 0 | 0 | ? | ? | 1 | 0 | - | ? |
| ?               | 1 | 0 | 0 | - | 0 | 0 | 0 | 0 | 1 | 0 | 0 | 0 | 0 | 0 |
| 0               | 0 | 1 | 0 | 0 | 0 | 0 | 1 | ? | 0 | 1 | 0 | ? | 0 | 0 |

|                |   |   |   |   |   |   |   |   |   |   |   |   |   |   |   |
|----------------|---|---|---|---|---|---|---|---|---|---|---|---|---|---|---|
|                | 0 | ? | ? | ? | ? | 0 | ? | 0 | 0 | 0 | 1 | ? | 0 | - | 1 |
|                | 0 | 0 | 0 | 0 | 0 | 0 | ? | ? | ? | ? | ? | ? | ? | 0 | 0 |
|                | ? | ? | ? | ? | ? | ? | 0 | ? | ? | ? | ? | ? | ? | - | 0 |
|                | ? | 0 | - | 1 | ? | 0 | 0 | 0 | ? | ? | ? | ? | ? | ? | ? |
| Rhenopterus    | 1 | 1 | 0 | 0 | 1 | 0 | 0 | 0 | 1 | 5 | 0 | 0 | 0 | ? | 0 |
|                | 0 | 1 | 0 | 3 | 0 | 0 | 0 | 0 | 3 | 0 | 0 | 0 | 0 | 0 | - |
|                | 0 | 0 | 1 | 3 | 0 | 0 | 0 | ? | 0 | 0 | 0 | - | 1 | 1 | 0 |
|                | 1 | 0 | 0 | - | 1 | 2 | 2 | 0 | 0 | 0 | ? | 0 | 0 | - | - |
|                | 0 | 0 | 0 | 1 | ? | 0 | 0 | 0 | 0 | ? | ? | 1 | 0 | - | ? |
|                | ? | 1 | 0 | 0 | - | 0 | 0 | 0 | 0 | 1 | 0 | 0 | 0 | 0 | 0 |
|                | 0 | 0 | 1 | 0 | 0 | 0 | 0 | 1 | ? | 0 | 1 | 0 | ? | 0 | 0 |
|                | 0 | ? | ? | ? | ? | 0 | ? | 0 | 0 | 0 | 1 | ? | 0 | - | 1 |
|                | 0 | 0 | 0 | 0 | 0 | 0 | ? | ? | ? | ? | ? | ? | ? | 0 | 0 |
|                | ? | ? | ? | ? | ? | ? | 0 | ? | ? | ? | ? | ? | ? | - | 0 |
|                | ? | 0 | - | 1 | ? | 0 | 0 | 0 | ? | ? | ? | ? | ? | ? | ? |
| Buthidae       | 1 | 1 | 0 | 0 | 1 | 0 | 0 | 0 | 0 | 0 | 5 | 1 | 1 | 0 | 0 |
|                | 0 | 1 | 0 | 1 | 0 | 0 | 0 | 0 | 3 | 0 | 1 | 1 | 0 | 0 | - |
|                | 0 | 0 | 1 | 3 | 1 | 0 | 0 | 0 | 0 | ? | 0 | - | 1 | 1 | 0 |
|                | 1 | 0 | - | - | 1 | 2 | 2 | 0 | 0 | 0 | 1 | 2 | 3 | 1 | - |
|                | 0 | 0 | 0 | 1 | 0 | 0 | 0 | 1 | 1 | 1 | ? | 1 | 0 | - | 0 |
|                | 0 | 1 | 0 | 0 | - | 0 | 0 | 0 | 0 | 1 | 0 | 0 | 0 | 0 | 0 |
|                | 0 | 1 | 1 | 0 | 0 | 0 | - | 0 | - | 0 | 1 | 1 | ? | - | 0 |
|                | 0 | 0 | 0 | - | 1 | 0 | 1 | 1 | 1 | 1 | 1 | 0 | 0 | - | 1 |
|                | 0 | 0 | 0 | 0 | 0 | 0 | 0 | 1 | 1 | 0 | 0 | 0 | 1 | 0 | 1 |
|                | 1 | 1 | 0 | 1 | 0 | 1 | 0 | 1 | 1 | 0 | 0 | 1 | 1 | 1 | 0 |
|                | 1 | 0 | - | 0 | 1 | 0 | 0 | 0 | 0 | 0 | 0 | 1 | 0 | 0 | 0 |
| Scorpionidae   | 1 | 1 | 0 | 0 | 1 | 0 | 0 | 0 | 0 | 5 | 1 | 1 | 0 | 0 | 0 |
|                | 0 | 1 | 0 | 1 | 0 | 0 | 0 | 0 | 3 | 0 | 1 | 1 | 0 | 0 | - |
|                | 0 | 0 | 1 | 3 | 1 | 0 | 0 | 0 | 0 | ? | 0 | - | 1 | 1 | 0 |
|                | 1 | 0 | - | - | 1 | 2 | 2 | 0 | 0 | 0 | 1 | 2 | 3 | 1 | - |
|                | 0 | 0 | 0 | 1 | 0 | 0 | 0 | 1 | 1 | 1 | ? | 1 | 0 | - | 0 |
|                | 0 | 1 | 0 | 0 | - | 0 | 0 | 0 | 0 | 1 | 0 | 0 | 0 | 0 | 0 |
|                | 0 | 1 | 1 | 0 | 0 | 0 | - | 0 | - | 0 | 1 | 1 | ? | - | 0 |
|                | 0 | 0 | 0 | - | 1 | 0 | 1 | 1 | 1 | 1 | 1 | 0 | 0 | - | 1 |
|                | 0 | 0 | 0 | 0 | 0 | 0 | 0 | 1 | 1 | 0 | 0 | 0 | 1 | 0 | 1 |
|                | 1 | 1 | 0 | 1 | 0 | 1 | 0 | 1 | 1 | 0 | 0 | 1 | 1 | 1 | 0 |
|                | 1 | 0 | - | 0 | 1 | 0 | 0 | 0 | 0 | 0 | 0 | 1 | 0 | 0 | 0 |
| Proscorpius    | 1 | 1 | 0 | 0 | 1 | 0 | 0 | 0 | 0 | 5 | 0 | 0 | 0 | 0 | 0 |
|                | 0 | 1 | 0 | 0 | 0 | 0 | 0 | 0 | 3 | 0 | 0 | 0 | 0 | - | - |
|                | 0 | 0 | 1 | 3 | 1 | 0 | 0 | 0 | 0 | ? | 0 | - | 1 | 1 | 0 |
|                | 1 | 0 | - | - | 1 | 2 | 2 | 0 | 0 | 0 | ? | 2 | 3 | 0 | - |
|                | 0 | 0 | 0 | 1 | ? | 0 | ? | 1 | 0 | ? | ? | 1 | 0 | - | ? |
|                | ? | 1 | 0 | 0 | - | 0 | 0 | 0 | 0 | 1 | 0 | 0 | 0 | 0 | 0 |
|                | 0 | 0 | 1 | 0 | 0 | 0 | - | 0 | - | 0 | 1 | 1 | ? | - | 0 |
|                | 0 | ? | ? | - | 1 | 0 | ? | 0 | 0 | 0 | 1 | 0 | 0 | - | ? |
|                | 0 | 0 | 0 | 0 | 1 | 0 | ? | ? | ? | ? | ? | ? | ? | ? | 1 |
|                | ? | ? | ? | ? | ? | ? | 0 | ? | ? | ? | ? | ? | ? | 0 | 0 |
|                | ? | 0 | - | 0 | ? | 0 | 0 | 0 | ? | ? | ? | ? | ? | - | 0 |
| Mastigoproctus | 1 | 1 | 0 | 0 | 1 | 1 | 0 | 0 | 0 | 5 | 0 | 0 | 0 | 0 | 0 |
|                | 0 | 1 | 1 | ? | 0 | - | 0 | 0 | 3 | 0 | 0 | 0 | 0 | 0 | - |
|                | 1 | ? | 0 | 2 | 0 | 0 | 0 | ? | 0 | ? | 0 | - | 1 | 1 | 0 |
|                | ? | 0 | - | - | 1 | 3 | 2 | 0 | 0 | 1 | - | 2 | 1 | 0 | - |
|                | 0 | 1 | 0 | 0 | 1 | 1 | 0 | 0 | 0 | 2 | 0 | 1 | 1 | 1 | 1 |
|                | 1 | 0 | 0 | 0 | - | 0 | 0 | 0 | 0 | 1 | 0 | 0 | 0 | 0 | 0 |
|                | 0 | 0 | 1 | 0 | 0 | - | 0 | - | 0 | 1 | 1 | ? | - | 0 | 0 |
|                | 0 | 0 | ? | - | 1 | 0 | 1 | 1 | 0 | 0 | 1 | 0 | 0 | - | 1 |
|                | 0 | 0 | 0 | 1 | 1 | 0 | 0 | 0 | 1 | 0 | 0 | 1 | 1 | 0 | 0 |
|                | 1 | 1 | 1 | 1 | 0 | 1 | 0 | 1 | 1 | 1 | 1 | 0 | 0 | 0 | 0 |
|                | 1 | 0 | - | 0 | 1 | 1 | 2 | 1 | 1 | 1 | 1 | 0 | ? | 1 | 0 |
| Cupienius      | 1 | 1 | 0 | 0 | 1 | 0 | 0 | 0 | 0 | 5 | 0 | 0 | 0 | 0 | 0 |
|                | 0 | 1 | 0 | ? | 0 | - | 0 | 0 | 3 | 0 | 0 | 0 | 0 | 0 | - |
|                | 1 | ? | 0 | 0 | 0 | 0 | 0 | - | - | ? | 0 | - | 1 | 1 | 0 |
|                | 1 | 0 | - | - | 1 | 3 | 2 | 0 | 0 | 1 | - | 2 | 0 | - | - |
|                | 0 | 0 | 0 | 0 | 1 | 1 | 0 | 0 | 0 | 2 | 0 | 1 | 0 | - | 1 |
|                | 1 | 1 | 0 | 0 | - | 0 | 0 | 0 | 0 | 1 | 0 | 0 | 0 | 0 | 0 |
|                | 0 | 0 | 0 | 1 | 1 | 0 | - | 0 | - | 0 | 1 | 1 | ? | 0 | 0 |
|                | 0 | ? | ? | ? | 1 | 0 | 1 | 1 | 0 | 0 | 1 | 0 | 0 | - | 1 |
|                | 0 | 0 | 0 | 1 | 1 | 0 | 0 | 0 | 1 | 0 | 0 | 1 | 1 | 0 | 0 |
|                | 1 | 1 | 0 | 1 | 0 | 1 | 0 | 1 | 1 | 1 | 1 | 0 | 0 | 0 | 0 |
|                | 0 | 0 | - | 0 | 1 | 1 | 1 | 1 | 1 | 1 | 0 | 0 | 0 | 1 | 0 |
| Anthracomartus | 1 | 1 | 0 | 0 | 1 | 0 | 0 | 0 | 0 | 5 | 0 | 0 | 0 | 0 | 0 |
|                | 1 | 1 | 0 | ? | 0 | - | 0 | 1 | 2 | 1 | 0 | 0 | 0 | 0 | - |
|                | 0 | ? | 0 | 1 | 0 | 0 | 0 | - | - | ? | 0 | - | 1 | 1 | 0 |



|                         |   |   |   |   |   |   |   |   |   |   |   |   |   |   |   |
|-------------------------|---|---|---|---|---|---|---|---|---|---|---|---|---|---|---|
|                         | 0 | - | 0 | 0 | - | - | - | 0 | 0 | - | 0 | ? | - | - | - |
| Nebalia                 | 1 | 1 | 0 | 0 | 1 | - | 0 | 0 | 0 | 4 | - | - | - | - | - |
|                         | 0 | - | - | 0 | 0 | 0 | 0 | - | - | - | - | 0 | - | - | - |
|                         | 1 | - | - | - | 0 | 1 | ? | 0 | ? | 0 | - | 1 | 1 | 1 | 1 |
|                         | 0 | 0 | - | 0 | - | - | - | - | - | - | 1 | - | - | ? | 0 |
|                         | - | 0 | 0 | ? | ? | ? | ? | - | ? | ? | - | - | - | ? | ? |
|                         | - | - | 1 | 0 | 1 | 0 | 1 | 1 | - | - | - | - | 0 | - | 0 |
|                         | 0 | - | - | - | 0 | ? | ? | ? | 1 | 1 | 0 | ? | 1 | 0 | 0 |
|                         | 1 | 1 | 1 | 0 | 0 | 0 | 0 | - | 1 | 2 | 0 | - | 1 | 0 | ? |
|                         | 1 | 1 | 1 | - | ? | 0 | 0 | - | 0 | 0 | ? | 0 | 0 | 0 | 0 |
|                         | 0 | - | 1 | ? | 1 | 0 | - | - | - | - | - | - | - | 0 | - |
| Aysheaia                | 0 | - | 0 | 0 | - | - | - | 0 | 0 | - | 0 | 0 | - | - | - |
|                         | - | - | - | - | - | - | - | - | - | - | - | - | - | - | - |
|                         | - | 0 | - | - | - | 0 | 0 | - | - | - | 1 | 0 | 0 | - | 0 |
|                         | 0 | - | - | - | - | ? | - | - | - | - | - | ? | - | - | - |
|                         | 0 | - | 0 | ? | ? | ? | ? | - | ? | ? | - | - | - | - | ? |
|                         | ? | - | - | 0 | - | 0 | - | - | - | - | - | - | - | - | - |
|                         | 0 | 0 | - | - | - | - | - | ? | - | 0 | 0 | - | - | - | 0 |
|                         | - | - | - | - | ? | 0 | ? | ? | - | - | 0 | ? | 1 | 0 | 0 |
|                         | - | - | - | - | ? | - | ? | ? | 0 | 0 | ? | ? | ? | ? | 0 |
|                         | ? | ? | ? | ? | ? | 0 | 0 | - | - | - | - | - | - | - | 0 |
|                         | - | 0 | - | - | ? | - | - | - | ? | ? | ? | ? | ? | ? | - |
| Anomalocaris            | 0 | 0 | 0 | 1 | 0 | - | - | - | - | - | - | - | - | - | - |
|                         | - | - | - | - | - | - | - | - | - | - | - | - | - | - | - |
|                         | - | ? | - | - | - | 1 | 0 | - | - | - | 1 | 1 | 1 | - | - |
|                         | - | - | - | - | - | - | - | - | - | - | - | - | - | - | - |
|                         | 0 | - | - | ? | ? | ? | ? | - | ? | ? | - | - | - | - | ? |
|                         | ? | - | - | 0 | - | ? | - | - | - | - | - | - | - | - | - |
|                         | - | 0 | - | - | - | - | - | ? | - | 0 | 1 | 0 | ? | 1 | 0 |
|                         | ? | ? | ? | ? | 0 | 0 | ? | ? | - | - | 1 | 3 | 1 | 1 | 1 |
|                         | - | 0 | - | - | ? | - | ? | ? | 1 | ? | ? | ? | ? | ? | 0 |
|                         | ? | ? | ? | ? | ? | 1 | 1 | - | - | - | - | - | - | - | 0 |
| Opabinia                | - | 0 | - | - | ? | - | - | - | ? | ? | ? | ? | ? | ? | - |
|                         | - | - | - | - | - | - | - | - | - | - | - | - | - | - | - |
|                         | - | ? | - | - | - | 1 | 0 | - | - | - | 1 | 1 | 0 | - | - |
|                         | - | - | - | - | - | - | - | - | - | - | - | - | - | - | - |
|                         | 0 | - | - | ? | ? | ? | ? | - | ? | ? | - | - | - | - | ? |
|                         | ? | - | - | 0 | - | ? | - | - | - | - | - | - | - | - | - |
|                         | - | 0 | - | - | - | - | - | ? | - | 0 | 1 | 0 | ? | 1 | 0 |
|                         | ? | ? | ? | ? | 4 | 0 | ? | ? | - | - | 1 | 2 | 1 | 0 | 0 |
|                         | - | - | - | - | ? | - | ? | ? | 1 | 1 | ? | ? | ? | ? | 0 |
|                         | ? | ? | ? | ? | ? | 1 | 1 | - | - | - | - | - | - | - | 0 |
|                         | - | 0 | - | - | ? | - | - | - | ? | ? | ? | ? | ? | ? | - |
| Yohoia_tenuis           | 1 | 1 | 0 | 1 | 1 | - | 0 | 0 | 0 | 0 | 3 | - | - | 0 | 0 |
|                         | - | 0 | - | - | 1 | 0 | 0 | 0 | - | - | - | - | 0 | - | - |
|                         | - | 0 | - | - | - | 0 | 0 | 1 | 0 | 1 | 0 | - | 1 | 0 | 1 |
|                         | 1 | 0 | 0 | 0 | 1 | 0 | 0 | - | 0 | ? | ? | 0 | - | - | 0 |
|                         | 0 | - | 0 | ? | ? | ? | ? | - | ? | ? | - | - | - | - | ? |
|                         | ? | - | - | 0 | - | 0 | 0 | 0 | 1 | - | - | - | - | 0 | - |
|                         | 0 | 0 | - | - | - | 0 | 0 | ? | 1 | 0 | 1 | 0 | ? | 1 | 0 |
|                         | 0 | ? | ? | ? | 0 | 0 | ? | ? | - | - | 1 | 2 | 0 | - | ? |
|                         | 0 | 0 | 0 | - | ? | 0 | ? | ? | ? | ? | ? | ? | ? | ? | 0 |
|                         | ? | ? | ? | ? | ? | 1 | 0 | - | - | - | - | - | - | - | 0 |
|                         | - | 0 | - | - | ? | - | - | - | ? | ? | ? | ? | ? | ? | - |
| Alalcomenaeus_cambricus | 1 | 1 | 0 | 0 | 1 | - | 0 | 0 | 0 | 0 | 2 | - | - | - | 0 |
|                         | 0 | - | 0 | - | - | 0 | 0 | 0 | 0 | - | - | - | - | 0 | - |
|                         | - | - | 0 | - | - | 0 | 0 | 1 | 0 | 1 | 0 | - | 1 | 0 | - |
|                         | 1 | 1 | 0 | 0 | 0 | 1 | 1 | 1 | - | 1 | ? | ? | 0 | - | - |
|                         | 0 | 0 | - | 0 | ? | ? | ? | ? | ? | - | ? | ? | - | - | - |
|                         | ? | ? | - | - | 0 | - | 0 | 0 | 0 | 1 | - | - | - | - | 0 |
|                         | - | 0 | 0 | - | - | 0 | 0 | ? | 1 | 0 | 1 | 0 | ? | ? | ? |
|                         | 0 | 0 | ? | ? | ? | ? | 0 | ? | ? | - | - | 1 | 2 | 0 | - |
|                         | ? | 0 | 0 | 0 | - | ? | 0 | ? | ? | 1 | 0 | ? | ? | ? | ? |
|                         | 0 | ? | ? | ? | ? | ? | 1 | 0 | - | - | - | - | - | - | - |
|                         | 0 | - | 0 | - | 0 | ? | - | - | ? | ? | ? | ? | ? | ? | - |
| Leanchoilia_superlata   | 1 | 1 | 0 | 0 | 1 | - | 0 | 0 | 0 | 0 | 2 | - | - | - | 0 |
|                         | 0 | - | 0 | - | - | 1 | 0 | 0 | 0 | - | - | - | - | 0 | - |
|                         | - | - | 0 | - | - | 0 | 0 | 2 | 0 | 1 | 0 | - | 1 | 0 | - |
|                         | 1 | 1 | 0 | 0 | 0 | 1 | 1 | 1 | - | 1 | ? | ? | 0 | - | - |
|                         | 0 | 0 | - | 0 | ? | ? | ? | ? | ? | - | ? | ? | - | - | - |
|                         | ? | ? | - | - | 0 | - | 0 | 0 | 0 | 1 | - | - | - | - | 0 |

|             |   |   |   |   |   |   |   |   |   |   |   |   |   |   |
|-------------|---|---|---|---|---|---|---|---|---|---|---|---|---|---|
| -           | 0 | 0 | - | - | - | 0 | 0 | ? | 1 | 0 | 1 | 0 | ? | 0 |
| 0           | 0 | ? | ? | ? | ? | 0 | ? | ? | - | - | 1 | 2 | 0 | - |
| ?           | 0 | 0 | 0 | - | ? | 0 | ? | ? | 1 | 1 | ? | ? | ? | ? |
| 0           | ? | ? | ? | ? | ? | 1 | 0 | - | - | - | - | - | - | - |
| 0           | - | 0 | - | 0 | ? | - | - | - | ? | ? | ? | ? | ? | - |
| Eoredlichia | 1 | 1 | 1 | 0 | 1 | - | 0 | 0 | 1 | 3 | - | - | 0 | 1 |
| -           | 0 | - | - | 0 | 0 | 1 | 1 | - | - | - | - | 0 | - | - |
| -           | 0 | - | - | - | 0 | 0 | - | - | - | 0 | - | 1 | 1 | 1 |
| 1           | 0 | 1 | 0 | 0 | - | - | - | - | - | 0 | - | - | - | 0 |
| 0           | - | 0 | ? | ? | ? | ? | ? | - | ? | ? | - | - | - | ? |
| ?           | - | - | 0 | - | 0 | 0 | 0 | 1 | - | - | - | - | 0 | - |
| 0           | 0 | - | - | - | 0 | 0 | 1 | 2 | 0 | 1 | 0 | 0 | 0 | 1 |
| 0           | ? | ? | ? | ? | 0 | 0 | 0 | - | - | 1 | 2 | 0 | - | 1 |
| 1           | 0 | 0 | - | ? | 0 | ? | ? | ? | ? | ? | ? | ? | ? | 0 |
| ?           | ? | ? | ? | ? | 1 | 0 | 0 | - | - | - | - | - | - | 0 |
| -           | 0 | - | 0 | ? | - | - | - | ? | ? | ? | ? | ? | - | - |
| Olenoides   | 1 | 1 | 1 | 0 | 1 | - | 0 | 0 | 1 | 3 | - | - | 0 | 1 |
| -           | 0 | - | - | 0 | 0 | 1 | 1 | - | - | - | - | 0 | - | - |
| -           | 0 | - | - | - | 0 | 0 | - | - | - | 0 | - | 1 | 1 | 1 |
| 1           | 0 | 1 | 0 | 0 | - | - | - | - | - | - | 0 | - | - | 0 |
| 0           | - | 0 | ? | ? | ? | ? | ? | - | ? | ? | - | - | - | ? |
| ?           | - | - | 0 | - | 0 | 0 | 0 | 1 | - | - | - | - | 0 | - |
| 0           | 0 | - | - | - | 0 | 0 | 1 | 2 | 0 | 1 | 0 | 0 | 0 | 1 |
| 0           | ? | ? | ? | ? | 0 | 0 | 0 | - | - | 1 | 2 | 0 | - | 1 |
| 1           | 0 | 0 | - | ? | 0 | ? | ? | 1 | 1 | ? | ? | ? | ? | 0 |
| ?           | ? | ? | ? | ? | 1 | 0 | 0 | - | - | - | - | - | - | 0 |
| -           | 0 | - | 0 | ? | - | - | - | ? | ? | ? | ? | ? | - | - |
| Xylokorys   | 1 | 1 | 0 | 0 | 1 | - | 0 | 0 | 0 | 4 | - | - | 0 | 0 |
| -           | 0 | - | - | 0 | 1 | 0 | 1 | - | - | - | - | 0 | - | - |
| -           | 0 | - | - | - | 0 | 0 | ? | ? | 0 | 0 | - | 1 | 1 | 1 |
| ?           | 0 | 0 | 1 | 2 | - | - | - | - | - | - | 3 | - | - | 1 |
| 0           | - | 0 | ? | ? | ? | ? | ? | - | ? | ? | - | - | - | ? |
| ?           | - | - | 0 | - | 0 | 0 | 3 | 1 | - | - | - | - | 0 | - |
| 0           | 0 | - | - | - | 0 | 1 | ? | 3 | 0 | 0 | - | - | - | 0 |
| -           | - | - | - | ? | ? | ? | ? | - | - | 1 | 2 | 0 | - | 1 |
| 1           | 0 | 0 | - | ? | 0 | ? | ? | ? | ? | ? | ? | ? | ? | 0 |
| ?           | ? | ? | ? | ? | 1 | 0 | 0 | - | - | - | - | - | - | 0 |
| -           | 0 | - | 0 | ? | - | - | - | ? | ? | ? | ? | ? | - | - |
| Marrella    | 1 | 1 | 0 | 0 | 1 | - | 0 | 1 | 0 | 1 | - | - | 0 | 2 |
| -           | 0 | - | - | 0 | - | 0 | 0 | - | 0 | 0 | - | - | 0 | - |
| -           | 0 | - | - | - | 0 | 0 | ? | 0 | 0 | 0 | - | 1 | 1 | 1 |
| ?           | 0 | 0 | 1 | 2 | - | - | - | - | - | - | 4 | - | - | 1 |
| 0           | - | 0 | ? | ? | ? | ? | ? | - | ? | ? | - | - | - | ? |
| ?           | - | - | 0 | - | 0 | 0 | 0 | 1 | - | - | - | - | 0 | - |
| 0           | 0 | - | - | - | 0 | 1 | ? | 3 | 0 | 0 | - | - | - | 0 |
| -           | - | - | - | ? | ? | ? | ? | - | - | 1 | 2 | 0 | - | ? |
| ?           | 0 | 0 | - | ? | 0 | ? | ? | ? | ? | ? | ? | ? | ? | 0 |
| ?           | ? | ? | ? | ? | 1 | 0 | 0 | - | - | - | - | - | - | 0 |
| -           | 0 | - | 0 | ? | - | - | - | ? | ? | ? | ? | ? | - | - |

;
